# Supplementary material for: Thermo-responsive Polymer Encapsulated Gold Nanorods for Single Continuous Wave Laser-induced Photodynamic/photothermal Tumour Therapy
Source: Research Square preprint supplement (doi:10.21203/rs.3.rs-94362/v1), 2020-10-26
Supplement: Supplementary file 1 [file 78fa4a00adca663ea906da94.docx]

**Thermoresponsive polymer encapsulated gold nanorods for single continuous wave laser**-**induced photodynamic/photothermal tumor therapy**

Beilei Gong, Yuanbing, Huiyan Li, Xiaojun Li, XiaHuan, Jihong Zhou, Yuqing Chen, Jian Wu, Wei Li


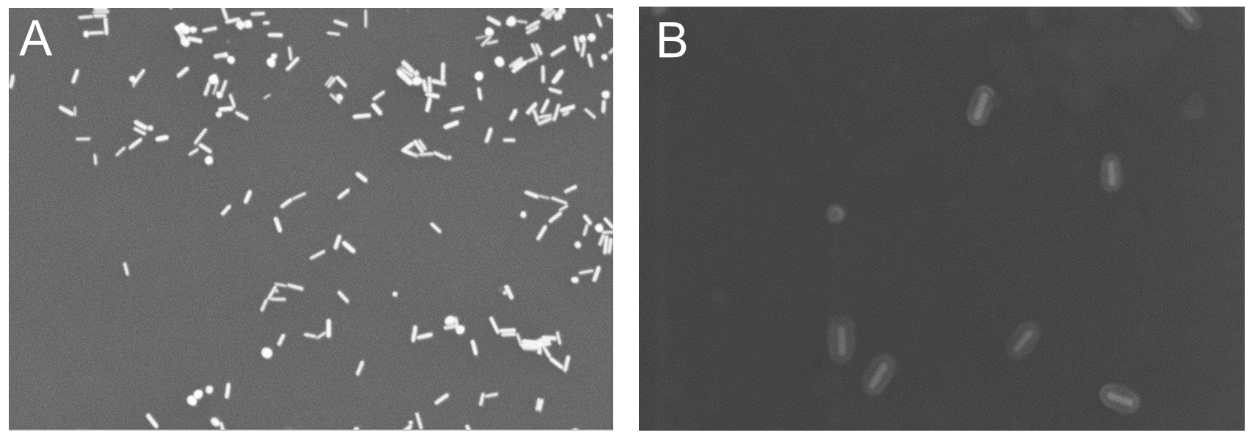


Figure S1 (A) SEM images of AuNRs, (B) SEM images of AuNRs@SiO2.


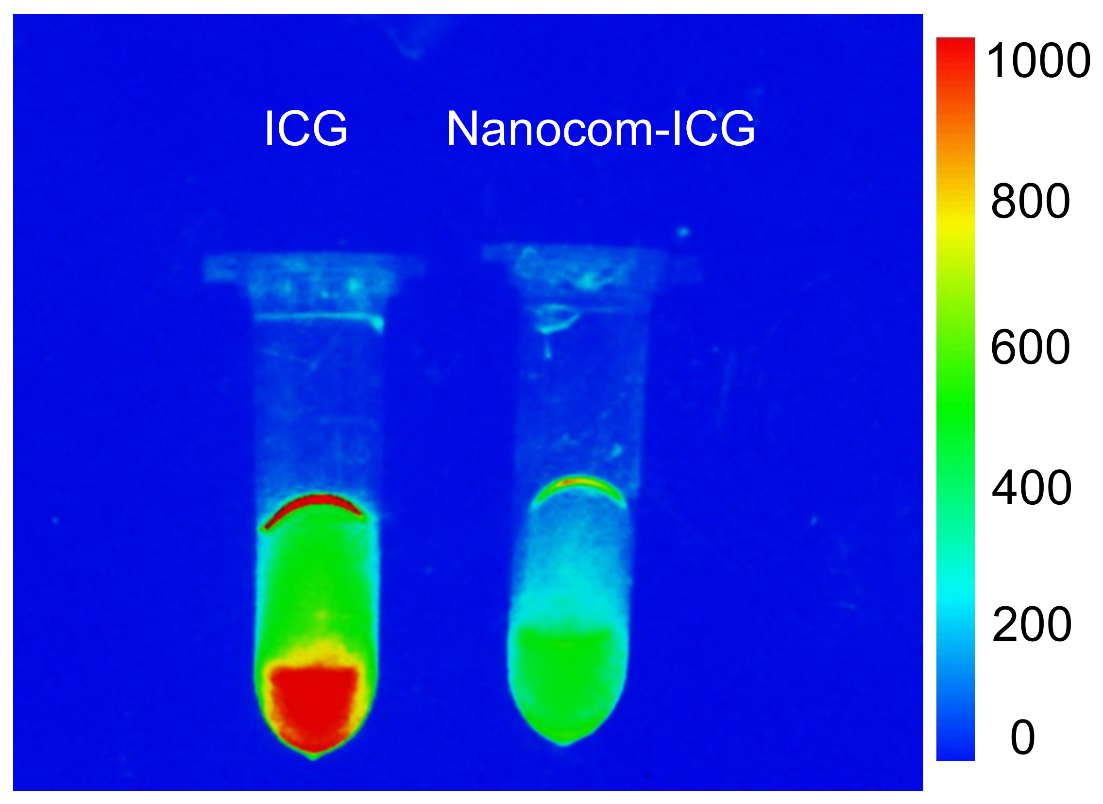


Figure S2. The fluorescence pictures of ICG and Nanocom-ICG (excitation=710 nm, emission=815 nm).


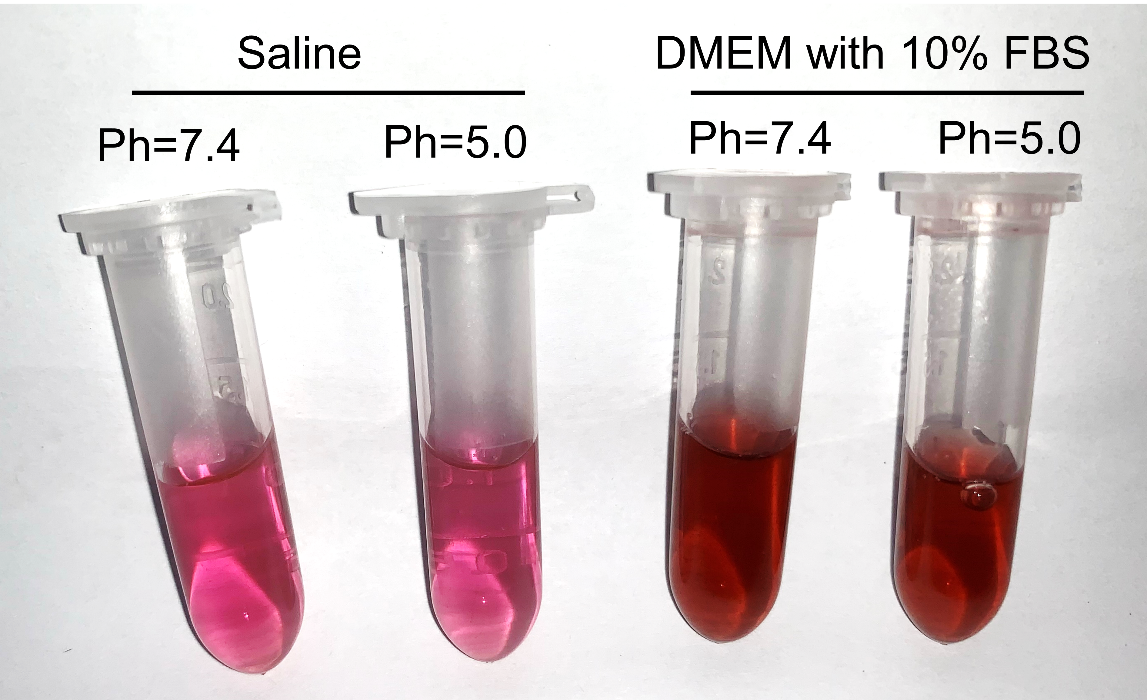


Figure S3. Digital photo of Nanocom-ICG dispered in different solutions at different pH values for 2 weeks.


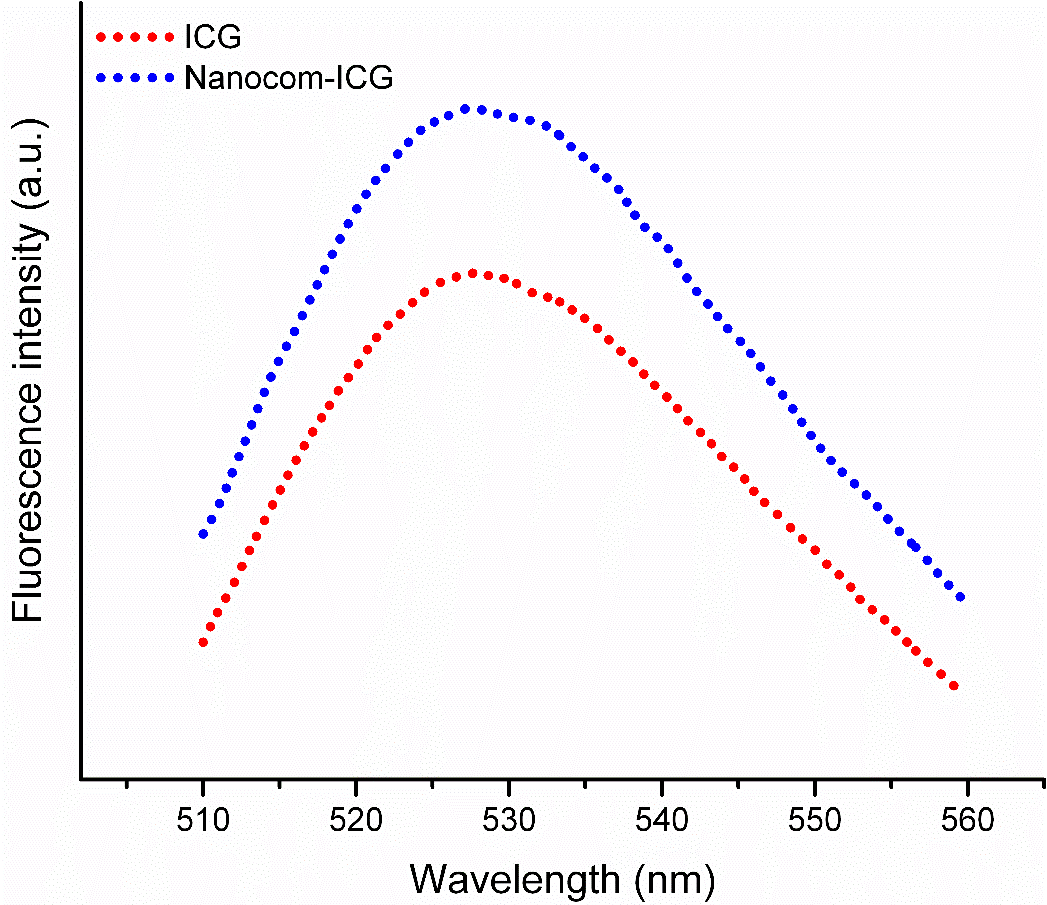


Figure S4. The SOSG fluorescence spectra of ICG and nanocom-ICG after laser irradiation for 5 minutes (0.8 W/cm2).


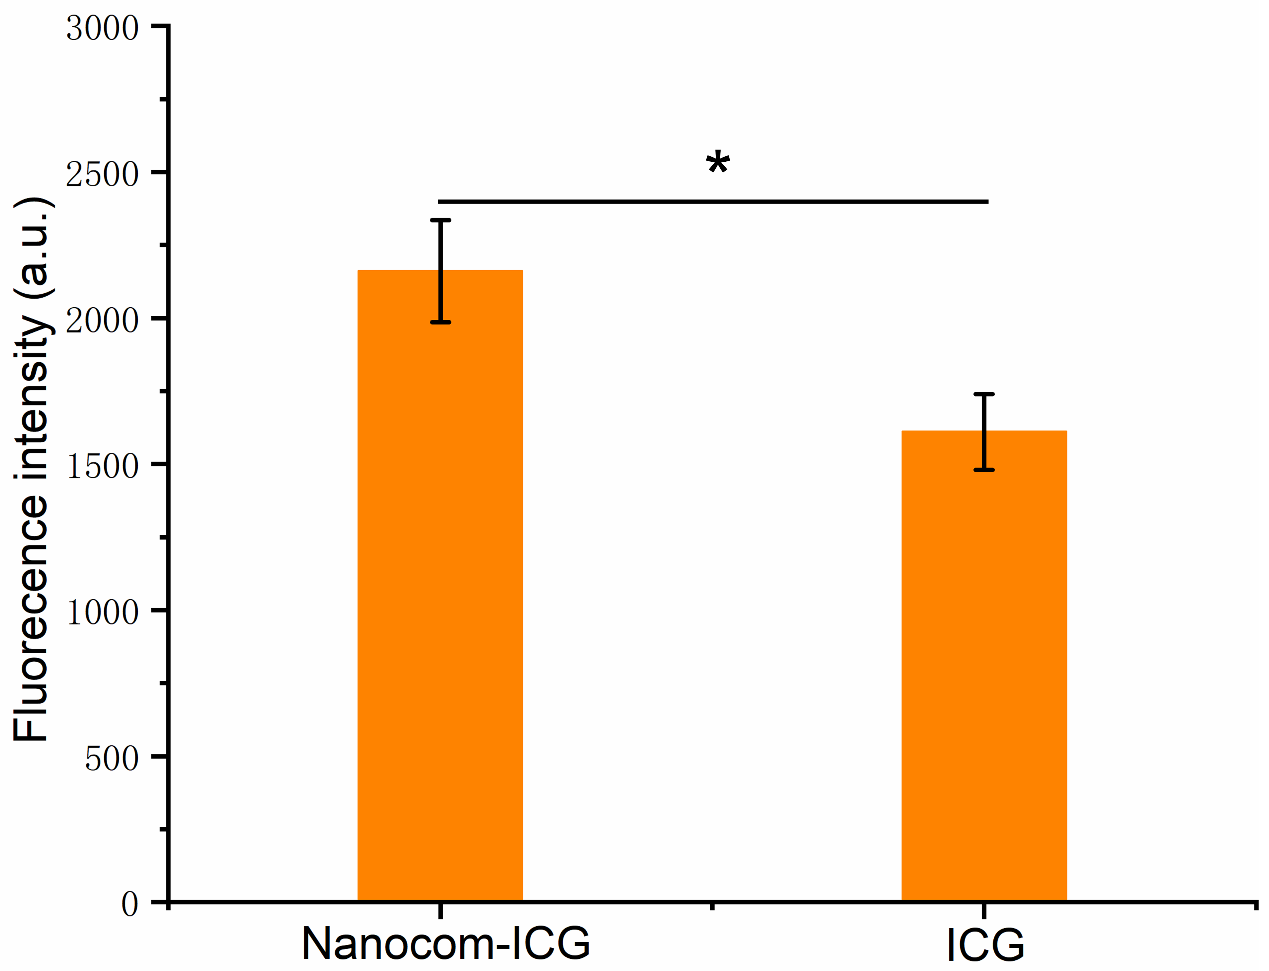


Figure S5. Statistical analysis of singlet oxygen content generated by ICG and the material after 5 minutes of laser irradiation (0.8 W/cm2). n = 3, **p*< 0.05.


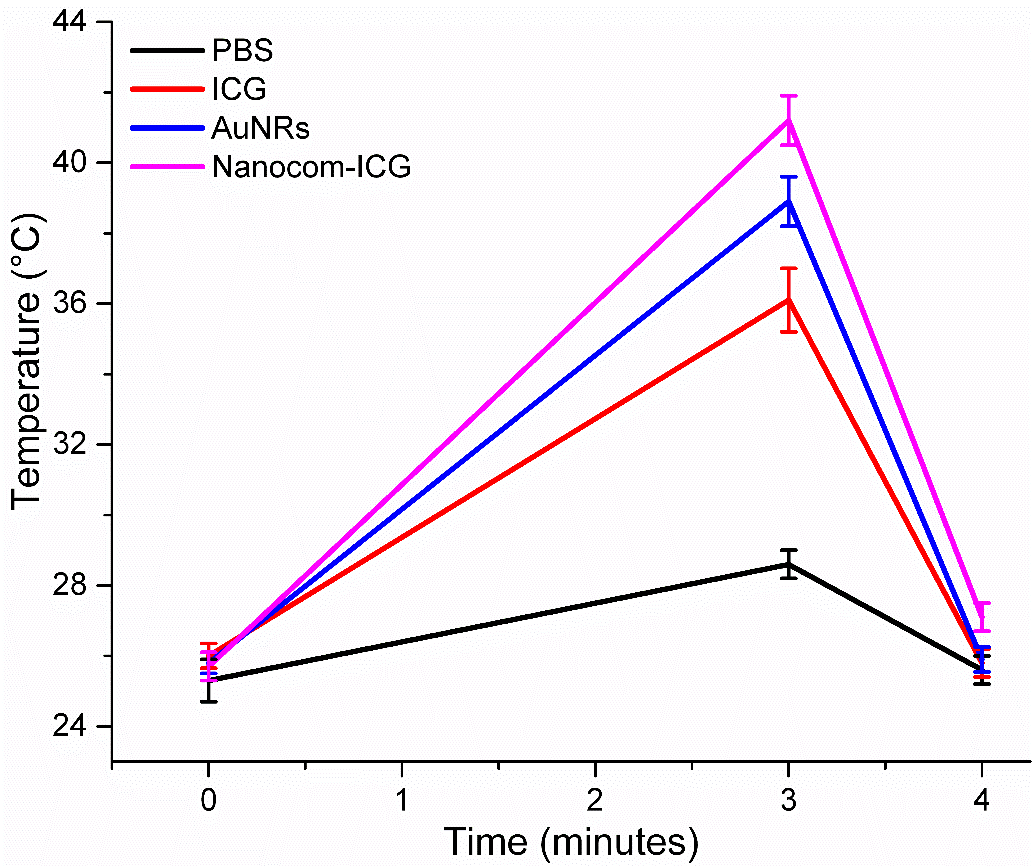


Figure S6. The temperature curves of tumor tissue regions of tumor-bearing mice during laser irradiation.
